# Supplementary material for: Dehydration from conserved stem regions is fundamental for ligand-dependent conformational transition of the adenine-specific riboswitch
Source: Royal Society of Chemistry journal article supplement (doi:10.1039/c2cc34506d), 2012-01-01
Supplement: c2cc34506d.pdf [file c2cc34506d.pdf]

## **Electronic Supplementary Information**

# Dehydration from conserved stem regions is fundamental for ligand-dependent conformational transition of adenine-specific riboswitch

Vinit Kumar,<sup>†</sup> Tamaki Endoh,<sup>†</sup> Kentaro Murakami,<sup>‡</sup> and Naoki Sugimoto<sup>\*,†,‡</sup>

<sup>†</sup> Frontier Institute for Biomolecular Engineering Research (FIBER), Konan University, 7-1-20 Minatojima-minamimachi, Kobe 650-0047, Japan

<sup>‡</sup> Faculty of Frontiers of Innovative Research in Science and Technology (FIRST), Konan University, 7-1-20 Minatojima-minamimachi, Kobe 650-0047, Japan

Email: sugimoto@konan-u.ac.jp

### Preparation of *add-A* riboswitch

The riboswitch was transcribed from a DNA template using ScriptMAX Thermo T7 Transcription Kit (Toyobo). The crude transcripts were purified in a denaturing polyacrylamide gel.

For preparation of DNA template, the sense primer containing T7 promoter had the sequence 5'-GCTAATACGACTCACTATAGGCTTCATATAATCCTAATGATATGGTTTGGGAGTTTCTACCAAGAGCC-3' and the antisense primer sequence was 5'-GACTTCATAATCAAGAGTTTAAG GCTCTTGGTAGAACTCCC-3'.

### Fluorescence measurement of 2-AP

Various concentrations (0–2  $\mu\text{M}$ ) of *add-A* riboswitch were mixed with 200 nM 2-AP in total volume of 100  $\mu\text{L}$  buffer containing 50 mM sodium MOPS (pH 7.3) and 100 mM KCl in the presence or absence of PEG200 (5–30 wt%). Reaction mixtures were incubated at 70  $^{\circ}\text{C}$  for 10 min and cooled to 25 $^{\circ}\text{C}$  at 1 $^{\circ}\text{C min}^{-1}$ . Aliquots of the reaction mixtures (90  $\mu\text{L}$ ) were transferred to wells of a 96-well, black plate (Nunc). The fluorescence signal due to 2-AP was measured at 25 $^{\circ}\text{C}$  in an Infinite M200 PRO fluorescence micro plate reader (TECAN) with 300 nm excitation and 380 nm emission.

### Partial digestion of RNA by RNase T1

A 5'-fluorescein-labeled *add-A* riboswitch was prepared using 5' end tag nucleic acid labeling system (Vector Laboratories) and was purified in a denaturing polyacrylamide gel. A total of 25 pmol labeled riboswitch in buffer containing 50 mM sodium MOPS (pH 7.3) and 100 mM KCl in the presence or absence of 30 wt% PEG200 and with or without 300  $\mu\text{M}$  2-AP was incubated at 70 $^{\circ}\text{C}$  for 10 min and cooled to 25 $^{\circ}\text{C}$  at 1 $^{\circ}\text{C min}^{-1}$ . The samples were incubated with 0.1 U of RNase T1 (Roche) at 25 $^{\circ}\text{C}$  for 10 min and electrophoresed on a 10 % denaturing polyacrylamide gel at 45 $^{\circ}\text{C}$ . The fluorescein signal in the gel was imaged using a fluorescence image scanner (FLA-7000, Fuji Film) with 473 nm excitation and 520 nm emission.

### **Water activity measurement**

The water activities were determined via vapor phase osmometry using a model 5520XR pressure osmometer (Wescor).

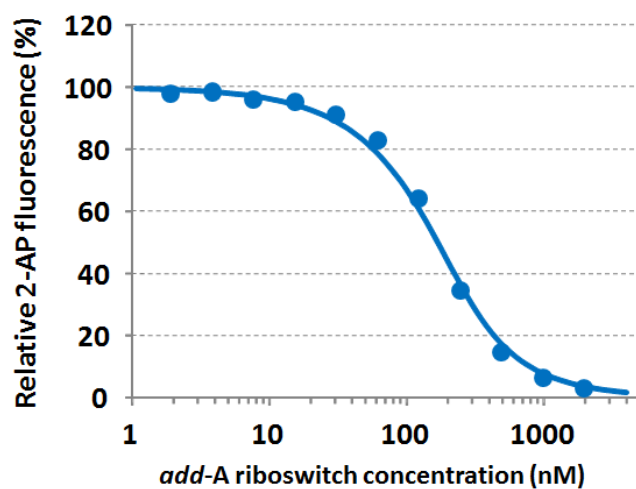

**Fig. S1.** Relative fluorescence intensities of 2-AP (200 nM) mixed with *add-A* riboswitch in the presence of 20 mM MgCl<sub>2</sub> in a buffer solution containing 50mM sodium MOPS (pH 7.3) and 100 mM KCl at 25°C;  $\lambda_{ex}$  300 nm and  $\lambda_{em}$  380 nm.

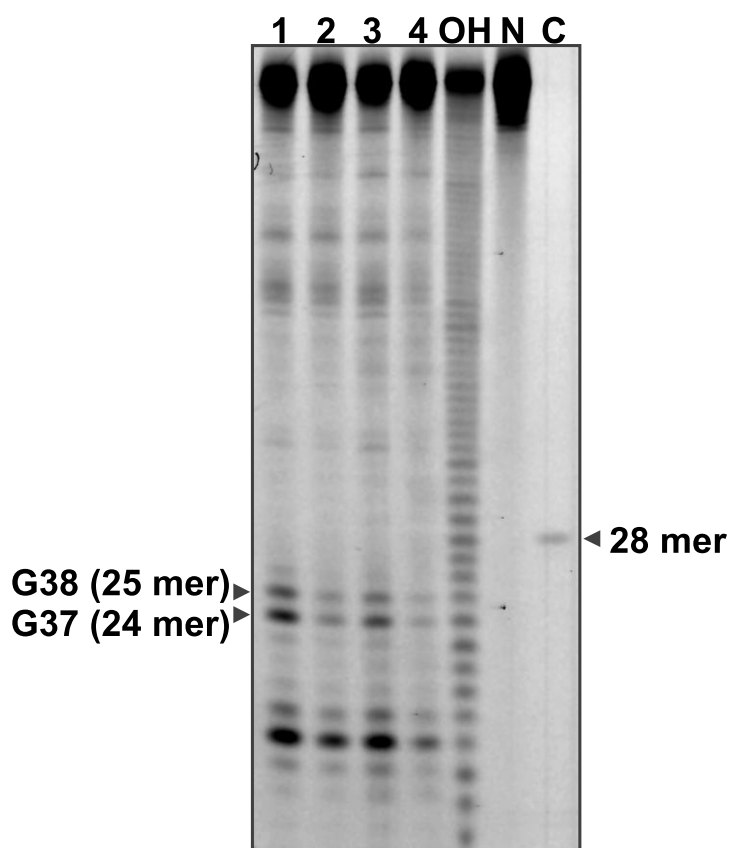

**Fig. S2.** Partial digestion of the *add-A* riboswitch using RNase T1. The fluorescein-labeled riboswitch was digested in buffer containing 50 mM sodium MOPS (pH 7.3), 100 mM KCl in the absence (lanes 1 and 2) or presence (lanes 3 and 4) of 30 wt% PEG200 and with (lanes 2 and 4) or without (lanes 1 and 3) 300  $\mu$ M 2-AP. Positions of monitored signals due to digestion at G37 and G38 are shown on the left. Alkaline digested riboswitch (lane OH), intact riboswitch (lane N), and 28-mer control RNA (lane C) were also evaluated.

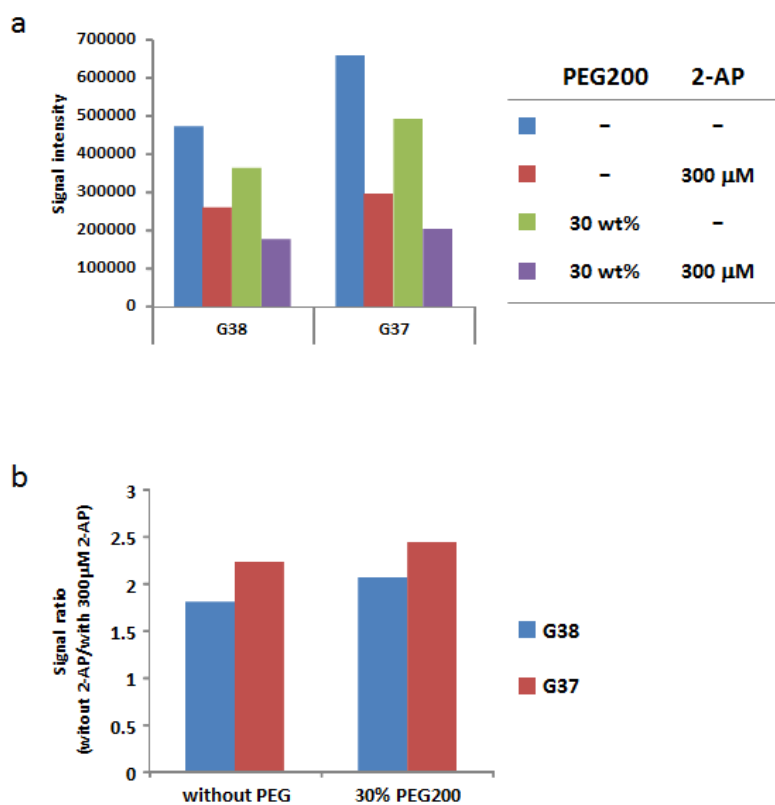

**Fig. S3.** (a) Signal intensities of *add-A* riboswitch digested by RNase T1 at G37 and G38 positions.

(b) Ratios of signal intensities due to digestion at G37 and G38 in the presence and absence of 300  $\mu$ M 2-AP with and without 30wt% PEG200.

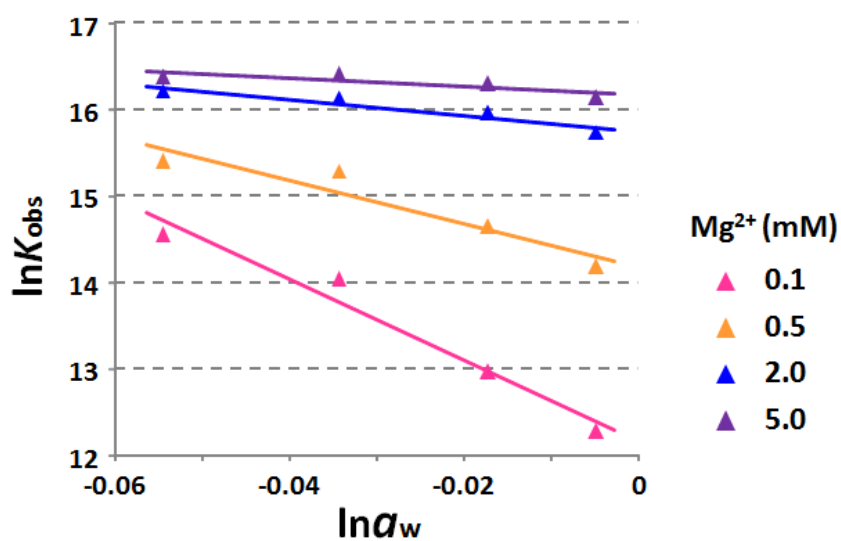

**Fig. S4.** Plots of  $\ln K_{\text{obs}}$  vs.  $\ln a_w$  for *add-A* riboswitch at different concentrations of  $\text{MgCl}_2$  in a buffer containing 50 mM sodium MOPS (pH 7.3), 100 mM KCl, and various concentrations of PEG200.

**Table S1:** Water activity in the presence of different amounts of PEG200 <sup>a</sup>

| PEG200 (wt%) | $\ln a_w$ |
|--------------|-----------|
| 0            | - 0.0048  |
| 5            | - 0.0108  |
| 10           | - 0.0172  |
| 15           | - 0.0271  |
| 20           | - 0.0342  |
| 25           | - 0.0440  |
| 30           | - 0.0544  |

- a) All values were measured in the buffer containing 50 mM sodium MOPS (pH 7.3) and 100 mM KCl at 25°C.
